# Supplementary material
Source: PubMed Central journal article supplement (PMC3284165)
Supplement: supp_M011395_jlr.M011395-1.pdf [file supp_M011395_jlr.M011395-1.pdf]

## SUPPLEMENTAL FIGURE LEGENDS

**Supplemental Figure 1.** DEXA Photos and mRNA levels involved in heart failure from *Dgat1*<sup>-/-</sup> mice. DEXA photos of chow-fed WT, *Dgat1*<sup>+/-</sup> and *Dgat1*<sup>-/-</sup> mice (A) and of high fat-fed WT, *Dgat1*<sup>+/-</sup> and *Dgat1*<sup>-/-</sup> mice (B) (n=5). *Anf* and *Bnp* mRNA levels in WT, *Dgat1*<sup>+/-</sup> and *Dgat1*<sup>-/-</sup> mice (n = 5) (C and D).

**Supplemental Figure 2.** Western blots for AKT and mTOR. Western blots for p-AKT(ser473) , total AKT, p-mTOR(ser2448) and total mTOR in high fat-fed hearts (A) and chow-fed soleus (B) from WT, *Dgat1*<sup>+/-</sup>, and *Dgat1*<sup>-/-</sup> mice.

**Supplemental Figure 3.** Western blots for PPAR $\alpha$ ,  $\beta$  and  $\gamma$ . Western blots for PPAR $\alpha$ ,  $\beta$  and  $\gamma$  in chow-fed hearts from WT, *Dgat1*<sup>+/-</sup>, and *Dgat1*<sup>-/-</sup> mice.

**Supplemental Figure 4.** Lipid uptake in DGAT1i pretreated AC16 cardiomyocytes. AC16 cardiomyocytes were pretreated with 5mM DGAT1i for 4 hrs and then incubated for 15 min with 0.5mM palmitic acid containing 9,10-[<sup>3</sup>H]palmitic. [<sup>3</sup>H] absorbed by cells was counted. (\*P<0.05, n=6)

Supplemental Figure 1

A Chow

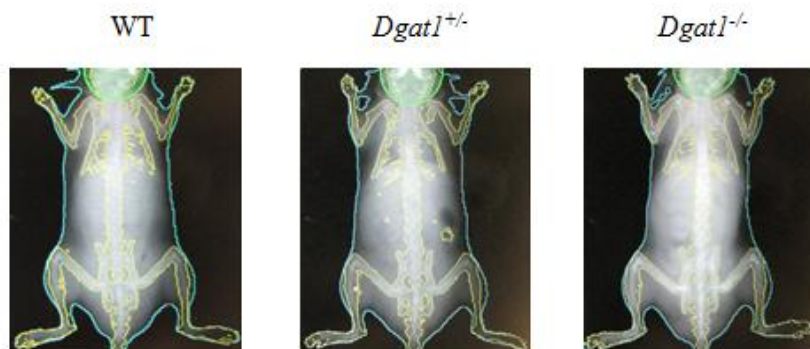

B High Fat

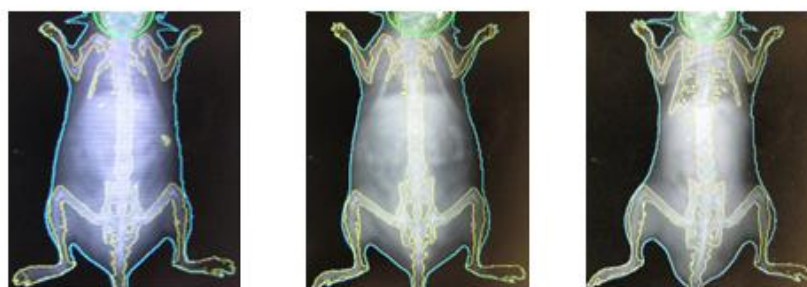

C

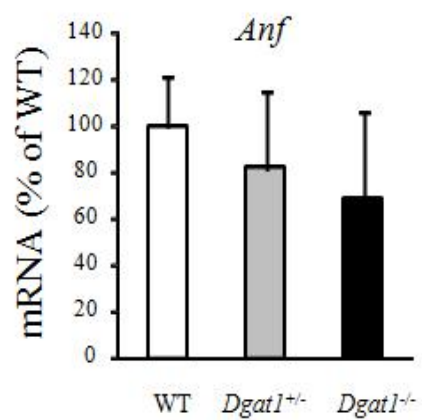

D

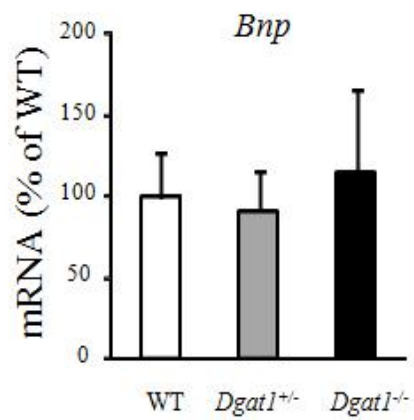

Supplemental Figure 2

A

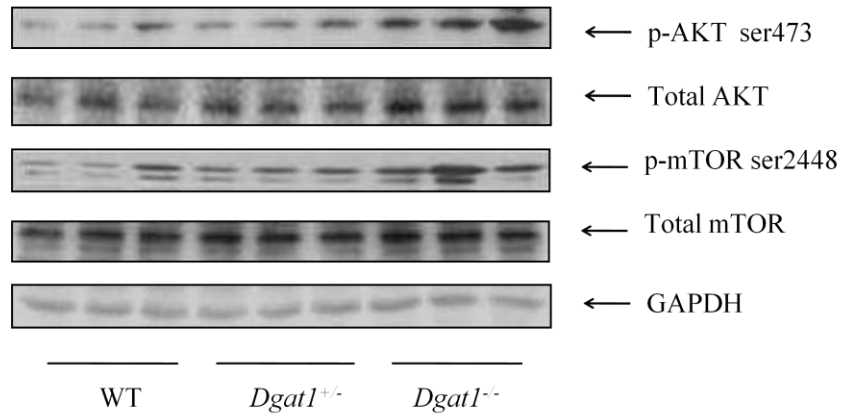

B

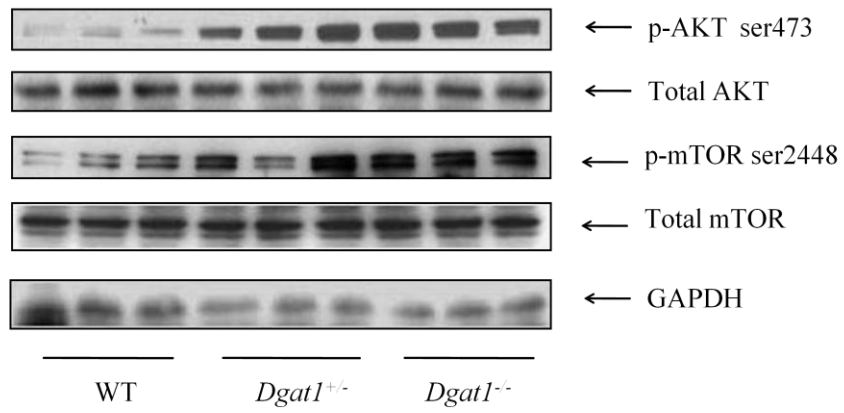

Supplemental Figure 3

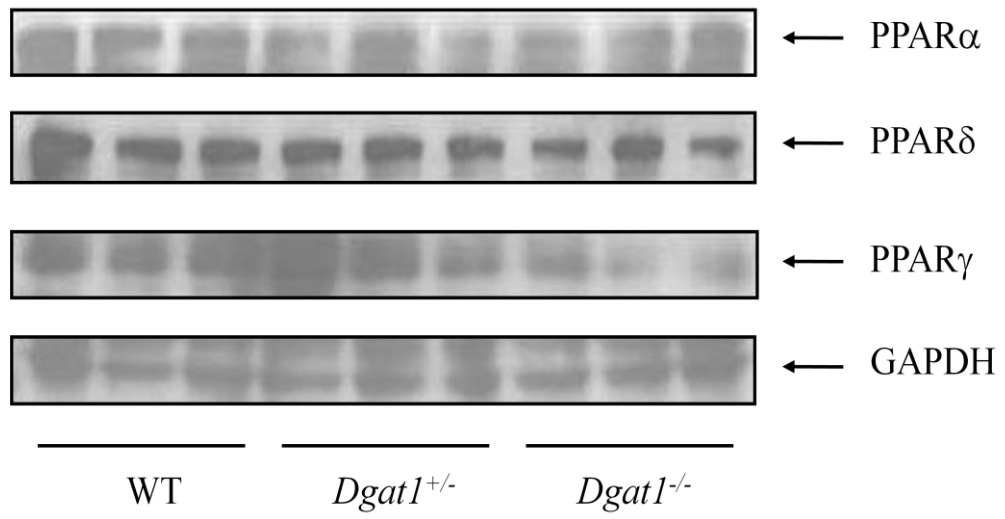

Supplemental Figure 4

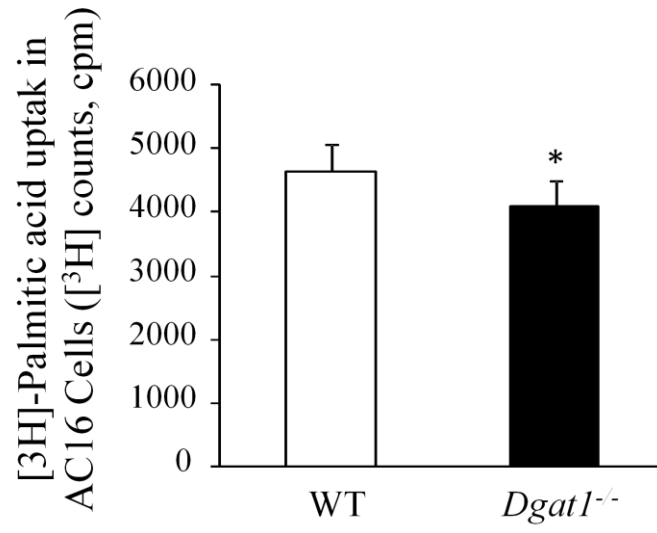

Supplemental Table 1

A. Primers of real-time PCR for mouse tissue

| <b>Gene</b>    | <b>Forward primer</b>     | <b>Reverse primer</b>    |
|----------------|---------------------------|--------------------------|
| <i>Dgat2</i>   | cagcaagaagtttctggcat      | cctcccaccacgatgatgat     |
| <i>Ppara</i>   | tgcagagcaacctccaga        | accggttaattaatggcgaat    |
| <i>Ppard</i>   | gcctcgggcttccactac        | agatccgatcgcacttctca     |
| <i>Pparg</i>   | gagtgtgacgacaagatttg      | ggtagggccagaatggcatct    |
| <i>Pgc1a</i>   | taggcccaggtacgacagc       | gctctttgcgggtattcatcc    |
| <i>Acol</i>    | atcacgggcacttatgc         | tctcacggatagggaca        |
| <i>Cpt1a</i>   | ctccgagctcagtgaggacctaaag | caaataccactgcaattttgtg   |
| <i>Cpt1b</i>   | gatgtttgcagagcacggca      | ccaggtacctgctcacggta     |
| <i>Pdk4</i>    | gaccgcttagtaacac          | gtaacgggggtccactg        |
| <i>Cd36</i>    | aatggcacagacgcgcct        | ggttgctggattctgga        |
| <i>Lpl</i>     | tctgtacggcacagtgg         | cctctc gatgacgaagc       |
| <i>Atgl</i>    | cgcttgctgagaatcaccat      | agtgagtggtggtgaaaggt     |
| <i>Anf</i>     | ggaaatgggatagaggtcaggtg   | gtgattaaaccggcaagcaaggc  |
| <i>Bnp</i>     | aggtttgctatctggca         | atgtcgaagttaaggctctgga   |
| <i>Hnf4a</i>   | agaatgacctgaagcaccagg     | gccagaggtctgtgaaacaagg   |
| <i>Glut1</i>   | tcgtaacgaggagaaccg        | ggccgtgtgacgata          |
| <i>Glut4</i>   | agagtctaaagcgct           | ccgagaccaacgtgaa         |
| <i>b-actin</i> | aggcccagagcaagagaggta     | gggggtgtgaaaggtctcaaaaca |

B. Primers of real-time PCR for AC16 human cardiomyocytes

| <b>Gene</b>    | <b>Forward primer</b>    | <b>Reverse primer</b>  |
|----------------|--------------------------|------------------------|
| <i>Ppara</i>   | ctgtcgggatgtcacacaac     | ccgcaaacacctactggatt   |
| <i>Ppard</i>   | gctgtgcaggagatcacaga     | gggtccataaaagtcaccaa   |
| <i>Pparg</i>   | actgagttcgccaagagcat     | gcgttgaaactgacagcaaa   |
| <i>Pdk4</i>    | gagaggtggagcatttctcg     | cagaatgttggcgagtctca   |
| <i>Cd36</i>    | attggtcaagccagct         | tgtaggctcatccactac     |
| <i>Cpt1b</i>   | tgaccaaagaagcagcaatg     | agcataccaacaccaaagc    |
| <i>Atgl</i>    | gcagtttctgctgaagtc       | gctcgtccttgaggtgaaag   |
| <i>b-actin</i> | gacaggatgcagaaggagattact | tgatccacatctgctggaaggt |

Supplemental Table 2

Plasma glucose, TG , TC, FFA concentrations in *Dgat1*<sup>+/-</sup> and *Dgat1*<sup>-/-</sup> mice

| Items           | Chow     |                             |                             | High Fat  |                             |                             |
|-----------------|----------|-----------------------------|-----------------------------|-----------|-----------------------------|-----------------------------|
|                 | WT       | <i>Dgat1</i> <sup>+/-</sup> | <i>Dgat1</i> <sup>-/-</sup> | WT        | <i>Dgat1</i> <sup>+/-</sup> | <i>Dgat1</i> <sup>-/-</sup> |
| Glucose (mg/dl) | 187±42   | 178±20                      | 166±31                      | 232±59    | 227±65                      | 211±42                      |
| TG (μmole/ml)   | 16.1±2.8 | 16.7±1.5                    | 15.4±1.5                    | 18.3±1.9  | 17.8±2.6                    | 16.3±1.1 <sup>#</sup>       |
| TC (μmole/ml)   | 17.8±1.8 | 17.2±2.1                    | 18.1±2.2                    | 24.6±3.7* | 25.7±2.9*                   | 23.0±1.4**                  |
| FFA (μmole/ml)  | 1.2±0.2  | 1.1±0.1                     | 1.2±0.3                     | 2.1±0.2*  | 2.3±0.4*                    | 2.0±0.1**                   |

\*P<0.05, \*\*P<0.01 vs chow-fed WT, <sup>#</sup>P<0.05 vs high fat-fed WT (n=4-5).

Supplemental Table 3

Muscle gene expression in *Dgat1*<sup>+/-</sup> and *Dgat1*<sup>-/-</sup> mice

| Gene         | Genotype |                             |                             |
|--------------|----------|-----------------------------|-----------------------------|
|              | WT       | <i>Dgat1</i> <sup>+/-</sup> | <i>Dgat1</i> <sup>-/-</sup> |
| <i>Ppara</i> | 100±25   | 79±50                       | 28±11**                     |
| <i>Ppard</i> | 100±39   | 67±20                       | 35±19*                      |
| <i>Pparg</i> | 100±32   | 60±32                       | 42±13*                      |
| <i>Cd36</i>  | 100±27   | 48±24                       | 21±11**                     |
| <i>Lpl</i>   | 100±45   | 65±33                       | 45±18*                      |
| <i>Atgl</i>  | 100±57   | 43±23                       | 29±9*                       |
| <i>Pdk4</i>  | 100±61   | 69±19                       | 23±12*                      |
| <i>Aox</i>   | 100±12   | 76±28                       | 52±22*                      |
| <i>Cpt1b</i> | 100±35   | 54±35                       | 33±6*                       |

\*P&lt;0.05 vs WT , \*\*P&lt;0.01 vs WT (n = 5-6)
